# A machine learning-based SNP-set analysis approach for identifying disease-associated susceptibility loci

Princess P. Silva<sup>a,b</sup>, Joverlyn D. Gaudillo<sup>a,b,c\*</sup>, Julianne A. Vilela<sup>d</sup>, Ranzivelle Marianne L. Roxas-Villanueva<sup>a,b</sup>, Beatrice J. Tiangco<sup>e,f</sup>, Mario R. Domingo<sup>c</sup>, Jason R. Albia<sup>a,g</sup>

<sup>a</sup>*Data-driven Research Laboratory (DARELab), Institute of Mathematical Sciences and Physics, University of the Philippines Los Baños, Laguna, 4031, Philippines*

<sup>b</sup>*Computational Interdisciplinary Research Laboratory (CINTERLabs), University of the Philippines Los Baños, Laguna, 4031, Philippines*

<sup>c</sup>*Domingo AI Research Center (DARC Labs), Pasig City, National Capital Region, 1606, Philippines*

<sup>d</sup>*Philippine Genome Center Program for Agriculture, Office of the Vice Chancellor for Research and Extension, University of the Philippines Los Baños, Laguna, 4031, Philippines*

<sup>e</sup>*National Institute of Health, UP College of Medicine, Taft Avenue, Manila, 1000, Philippines*

<sup>f</sup>*Division of Medicine, The Medical City, Pasig, 1605, Philippines*

<sup>g</sup>*Current affiliation: Venn Biosciences Corporation dba InterVenn Biosciences, Metro Manila, Philippines*

Tel.: +639171684992

Email address: [jdgaudillo@up.edu.ph](mailto:jdgaudillo@up.edu.ph)

Running head: MACHINE LEARNING-BASED SNP-SET ANALYSIS

## MACHINE LEARNING-BASED SNP-SET ANALYSIS

### 28 **Abstract**

### 29 **Introduction**

30 Identifying disease-associated susceptibility loci is one of the most pressing and crucial challenges  
31 in modeling complex diseases. Existing approaches to biomarker discovery are subject to several  
32 limitations including underpowered detection, neglect for variant interactions, and restrictive  
33 dependence on prior biological knowledge. Addressing these challenges necessitates more  
34 ingenious ways of approaching the “missing heritability” problem.

35

### 36 **Objectives**

37 This study aims to discover disease-associated susceptibility loci by augmenting previous genome-  
38 wide association study (GWAS) using the integration of random forest and cluster analysis.

39

### 40 **Methods**

41 The proposed integrated framework is applied to a hepatitis B virus surface antigen (HBsAg)  
42 seroclearance GWAS data. Multiple cluster analyses were performed on (1) single nucleotide  
43 polymorphisms (SNPs) considered significant by GWAS and (2) SNPs with the highest feature  
44 importance scores obtained using random forest. The resulting SNP-sets from the cluster analyses  
45 were subsequently tested for trait-association.

46

### 47 **Results**

48 Three susceptibility loci possibly associated with HBsAg seroclearance were identified: (1) SNP  
49 rs2399971, (2) gene LINC00578, and (3) locus 11p15. SNP rs2399971 is a biomarker reported in  
50 the literature to be significantly associated with HBsAg seroclearance in patients who had received

## MACHINE LEARNING-BASED SNP-SET ANALYSIS

51 antiviral treatment. The latter two loci are linked with diseases influenced by the presence of  
52 hepatitis B virus infection.

53

### 54 **Conclusion**

55 These findings demonstrate the potential of the proposed integrated framework in identifying  
56 disease-associated susceptibility loci. With further validation, results herein could aid in better  
57 understanding complex disease etiologies and provide inputs for a more advanced disease risk  
58 assessment for patients.

59

### 60 **Keywords**

61 Machine learning; Random forest; Cluster analysis; Single Nucleotide Polymorphisms; Genome-  
62 Wide Association Study; Hepatitis B

63

64

65

66

67

68

69

70

## MACHINE LEARNING-BASED SNP-SET ANALYSIS

### 71 **Introduction**

72 Understanding the emergence and progression of complex diseases incessantly pose challenges to  
73 researchers due to its intricate and multifactorial nature. These diseases are caused by interplays  
74 between genetics and environmental factors leading to a plethora of combinations that need to be  
75 considered in modeling. From the genetics' aspect, understanding the etiology of complex diseases  
76 necessitates an extensive localization of significant genomic variations due to its polygenic nature  
77 [1, 2, 3]. Identifying these biomarkers, albeit elucidating only a portion of the entire underpinnings  
78 of complex diseases, could nevertheless aid in increasing patients' chances of survival by allowing  
79 a more personalized and advanced disease risk assessment [4].

80

81 A genome-wide association study (GWAS) is the traditional approach employed to discover  
82 genetic biomarkers, i.e. single nucleotide polymorphisms (SNPs), associated with various traits  
83 and diseases [5]. GWAS has been successful in identifying several risk loci for a wide array of  
84 illnesses including cancer [6], Type 2 diabetes mellitus [7], Crohn's disease [8], and coronary  
85 artery disease [9], among others. However, despite these achievements, GWAS faces limitations  
86 due to its individual-SNP analysis approach exacerbated by the high dimensionality of genomic  
87 datasets. As multitudinous individual association tests are performed, stringent thresholds must be  
88 adopted to account for error rates leading to underpowered detection [10]. This increases the  
89 probability of not detecting SNPs with small effects that are truly associated with a trait and could  
90 significantly contribute to phenotypic variability [11]. The traditional GWAS approach also fails  
91 to capture SNP-SNP interactions as it only tests for the marginal effects of SNPs and disregards  
92 the variants' joint contributions to phenotypic expression. These interactions require explicit

## MACHINE LEARNING-BASED SNP-SET ANALYSIS

93 analysis since they are vital in addressing the “missing heritability” problem [12] which states that  
94 single genetic variations are insufficient in explaining the entire heritability of a trait.

95

96 Under the “polygenic paradigm”, refining statistical models, such as increasing sample sizes [13]  
97 and reducing the number of tests employed [14], is crucial in increasing the chances of discovering  
98 true associations. Empirical evidence [15, 16] has shown that as sample size increases, GWAS  
99 continues to yield more novel trait-associated loci. However, this approach is not always feasible  
100 [14] especially for studies involving small populations and diseases with low prevalence. For this  
101 reason, it is more viable to reduce the number of tests employed to relax the stringent conditions  
102 used to consider genomic variants as significant. Existing approaches to this latter strategy include  
103 haplotype-based association analysis and SNP-set analysis, both of which also address the inability  
104 of GWAS to capture SNP-SNP interactions [17, 18]. Haplotype-based analysis [19] accounts for  
105 linkage disequilibrium between SNPs; while SNP-set analysis, e.g. gene-based [20] and pathway-  
106 based analyses [21], considers the joint effects of variants on phenotypic expression. Aside from  
107 addressing the aforementioned GWAS’ limitations, SNP-set analysis further permits hypothesis  
108 testing on associations possibly existing between wider loci and traits [18]. However, when this  
109 type of analysis groups SNPs based on prior biological knowledge, a study’s success may be  
110 hampered when information on genetic variations and competitive pathways related to the trait are  
111 insufficient. To allow a less restricted analysis, it is necessary to explore other methods of forming  
112 SNP-sets using information independent of a priori biological knowledge.

113  
114 Machine learning (ML) is an innovative and powerful approach used in solving complex problems  
115 in various fields and disciplines due to its capability to handle and analyze high-dimensional

## MACHINE LEARNING-BASED SNP-SET ANALYSIS

116 datasets [22, 23, 24]. Several studies have already demonstrated the usability of ML in genomic  
117 datasets [25, 26, 27]; however, to our knowledge, there is only a handful of existing literature  
118 discussing its application to SNP-set formation [28, 29, 30, 31]. These studies employed cluster  
119 analysis to form SNP-sets in a data-driven manner. This approach could subsequently lead to the  
120 identification of novel risk loci associated with a trait [31], albeit there may be problems related to  
121 computational complexity and cost. As genomic datasets are usually of high dimension, it is  
122 susceptible to the “curse of dimensionality” [32, 33], a problem that could be addressed by solely  
123 clustering the SNPs found in certain genomic regions that are known to play a role in trait  
124 development [29, 30]. However, this approach defeats the purpose of performing an inclusive  
125 analysis as the search for significant biomarkers is restricted by relatively narrow regions. For a  
126 more varied selection of SNPs to analyze, dimensionality reduction techniques based on random  
127 forest (RF) could be used to reduce dataset dimensions before conducting cluster analysis. RF has  
128 been widely incorporated in SNP research [25, 34, 35, 36] due to its significant properties: (1) a  
129 nonparametric nature that allows the establishment of predictive models without the need for  
130 preliminary statistical assumptions, and (2) the capability to provide an importance score, i.e.  
131 variable importance measure (VIM) for each SNP, which increases the probability of detecting  
132 highly relevant biomarkers.

133  
134 Cluster analysis and random forest have already been proven applicable and effective in genomic  
135 data analysis, specifically in identifying predictive and presumably disease-associated SNPs [31,  
136 37]. However, based on the literature review, the integration of these approaches has not been  
137 explored on SNP data. This study aims to incorporate these two techniques to augment previous

## MACHINE LEARNING-BASED SNP-SET ANALYSIS

138 GWAS findings and allow the discovery of novel trait-associated susceptibility loci. The study  
139 implements the proposed integrated framework using the following three-step algorithm:

140

- 141 1. Dimensionality reduction through RF;
- 142 2. SNP-set formation through cluster analysis involving top-ranking SNPs from Step 1 and  
143 SNPs considered by GWAS to be significantly associated with the trait of interest (termed  
144 in this study as ‘GWAS-identified SNPs’); and
- 145 3. Association testing on the resulting SNP-sets from Step 2.

146

147 In Step 1, dimension reduction is implemented using random forest feature selection to circumvent  
148 the “curse of dimensionality” problem associated with analyzing high-dimensional SNP datasets  
149 [35]. In Step 2, top-ranking SNPs determined from the results of Step 1 and GWAS-identified  
150 SNPs are subjected to cluster analysis to evaluate shared similarities among the variants and form  
151 SNP-sets. Finally, Step 3 involves testing the SNP-sets derived from Step 2 for trait-association.  
152 The proposed methodology was applied to the GWAS data by [39] wherein the phenotype of  
153 interest is hepatitis B virus surface antigen (HBsAg) seroclearance, a marker for clearance of  
154 chronic hepatitis B virus (HBV) infection.

## 155 **Methodology**

156 This study proposes a novel machine learning-based SNP-set analysis approach for identifying  
157 disease-associated susceptibility loci. RF, cluster analysis, and previous GWAS findings were  
158 integrated into a single framework to increase detection power and account for SNP-SNP  
159 interactions—factors that are vital in addressing the “missing heritability” problem. The entire

## MACHINE LEARNING-BASED SNP-SET ANALYSIS

160 analysis is divided into three main parts: dimension reduction, SNP-set formation, and association  
161 testing. Fig. 1 shows the architecture of the proposed integrated framework.

### 162 **Data Description and Preprocessing**

163 The data used in this study was adopted from the GWAS conducted by [39] which aimed to  
164 identify susceptibility loci associated with HBsAg seroclearance among patients with chronic  
165 hepatitis B. The dataset is composed of 1,365,088 SNPs collected from 200 subjects of Korean  
166 ethnicity. The subjects were further divided into two groups: the cases ( $n = 100$ ), which consist of  
167 patients who had experienced HBsAg seroclearance before the age of 60, and the controls ( $n =$   
168  $100$ ) comprising of patients who exhibited high levels ( $> 1000$  IU/mL) of HBsAg at  $\geq 60$  years of  
169 age. An additive genetic model was utilized to transform the SNP dataset wherein 0, 1, and 2 were  
170 used to represent homozygous dominant, heterozygous, and homozygous recessive, respectively.

171

### 172 **Dimension Reduction**

173 Dimension reduction is commonly a prerequisite in analyzing SNP datasets as large amounts of  
174 features exceed the capability of analytical approaches in performing fast and effective analyses.  
175 In this study, VIM of RF was used to reduce dataset dimension by identifying highly predictive  
176 and informative SNPs prior to conducting cluster analysis. RF has been widely utilized in  
177 analyzing SNP data primarily due to its capacity to build a predictive model without making any  
178 assumptions about the underlying relationship between genotype and phenotype [40]. In RF, the  
179 predictive abilities of multiple decision trees, which are trained on bootstrap samples of the data,  
180 are consolidated to generate the final output prediction. In addition, randomization is not only  
181 induced by bootstrapping but also introduced at the node level when growing a tree. It selects a



## MACHINE LEARNING-BASED SNP-SET ANALYSIS

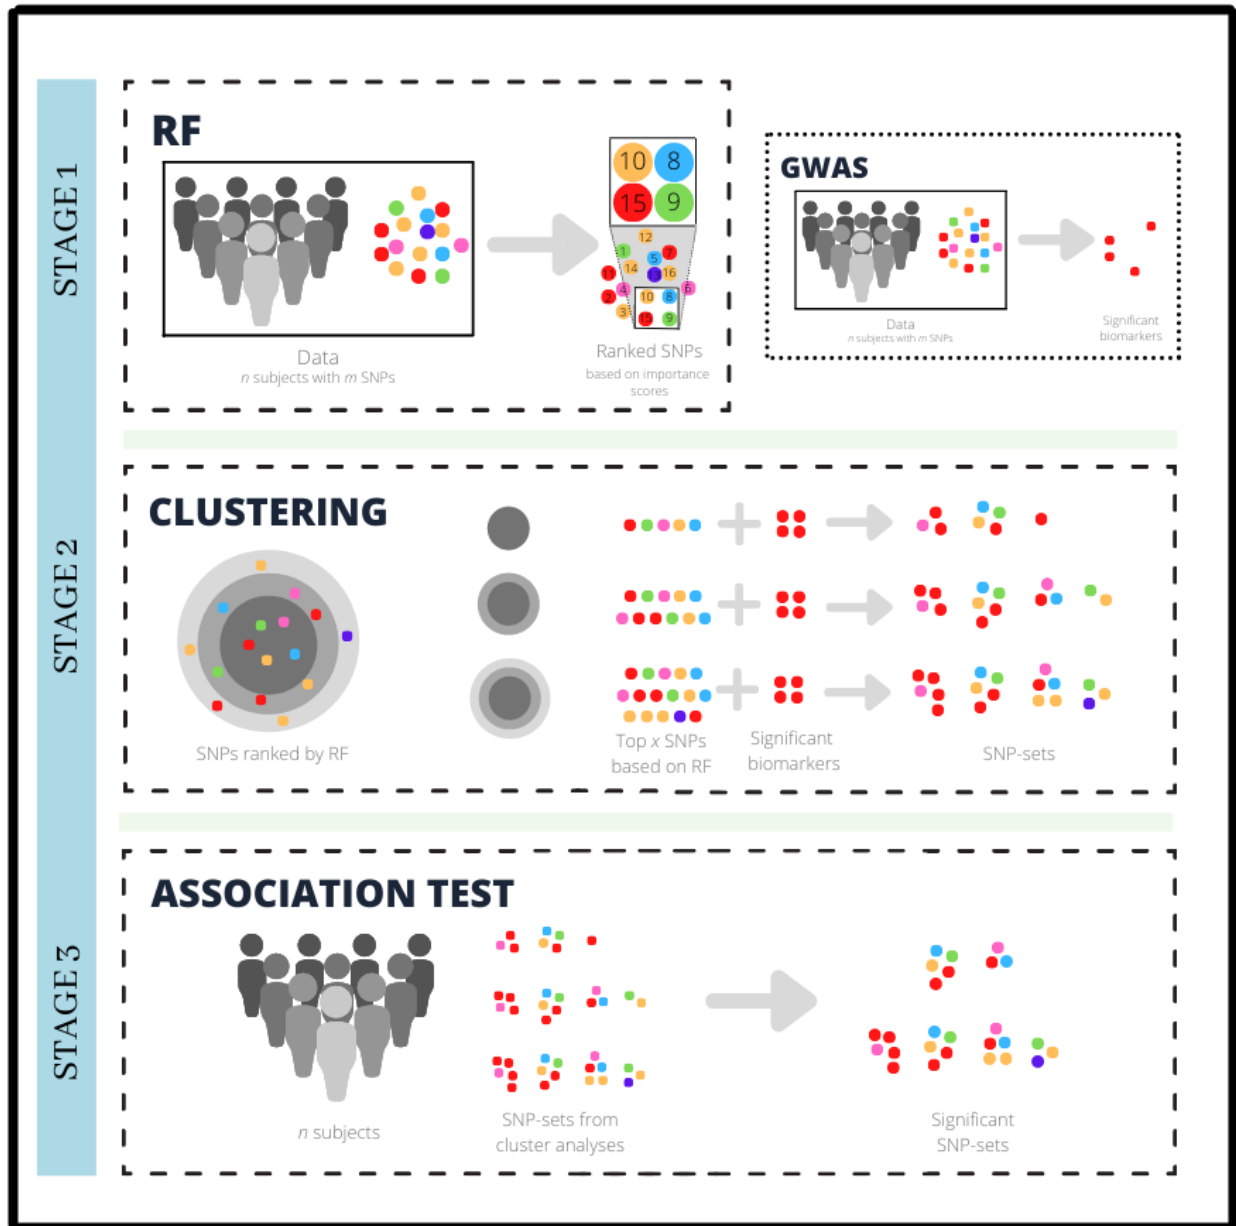

182

183 Fig. 1: The architecture of the proposed integrated framework. In Stage 2, SNPs in concentric

184 circles in darker shades of gray represent higher-ranking SNPs based on RF.

185

186 random subset of SNPs at each node of the tree as candidates to find the best split for the node. In

187 estimating the importance of SNPs, RF calculates the Gini importance which quantifies the

## MACHINE LEARNING-BASED SNP-SET ANALYSIS

188 difference between a node's impurity and the weighted sum of the impurities of the two descendent  
189 nodes.

190

191 Mathematically, the importance of  $SNP_j$  is determined by summing the decrease in impurity ( $\Delta I$ )  
192 for all the nodes  $t$ , where  $SNP_j$  is split. The decreases in impurity are weighted by fractions of  
193 samples in the nodes  $p(t)$  and averaged over all trees in the forest. The Gini variable importance  
194 is then given by,

$$195 \quad VI_{gini}^{(k)}(SNP_j) = \sum_{t \in T_k: v(s_t)} p(t) \Delta I(s_t, t)$$

196 where  $T_k$  is the number of nodes in the  $k^{th}$  tree,  $p(t) = \frac{n_t}{n}$  is the fraction of the samples reaching  
197 node  $t$ ; and  $v(s_t)$  is the variable used in the split  $s_t$ .

198

199 Step 1 of the proposed integrated framework uses a random forest classifier that is initially trained  
200 on the dataset and evaluated using leave-one-out cross-validation (LOOCV). LOOCV uses  $N - 1$   
201 observations as the training set and the excluded observation as the testing set, where  $N$  is the  
202 number of samples. This ensures reliability and unbiasedness in the estimation of model  
203 performance. The final feature importance score of a SNP is then calculated by averaging the  
204 scores of the said SNP obtained by RF for every fold in LOOCV.

### 205 **SNP-set formation**

206 This study exploited the similarities shared among SNPs to identify novel susceptibility loci  
207 associated with HBsAg seroclearance. The analysis utilized the unsupervised machine learning  
208 method known as cluster analysis which aims to separate data points into distinct groups such that

## MACHINE LEARNING-BASED SNP-SET ANALYSIS

209 more similarities are shared among objects within the same group than objects belonging to  
210 different groups. Similarities between SNPs can be quantified in terms of *agreement*, i.e. based on  
211 the occurrence of sequence alterations computed via matching coefficients and measures of  
212 correlation, or *dependence*, i.e. based on the presence or absence of dependence quantified via  
213 measures based on the  $\chi^2$ -statistic [41]. This study adopts an *agreement*-based similarity measure  
214 by employing the method proposed in [30]. This method modified an agglomerative hierarchical  
215 clustering algorithm with average linkage for continuous data to develop a Hamming distance-  
216 based algorithm for determining SNP-sets. Hamming distance is a similarity measure used to  
217 calculate the number of dissimilar components between two categorical data points of the same  
218 size [42]. Applied to SNP data, the Hamming Distance  $d^{HAD}$  between SNPs  $i$  and  $j$  would be,

219

$$220 \quad d^{HAD}(i, j) = \sum_{k=0}^{n-1} [y_{i,k} \neq y_{j,k}]$$

221

222 where  $n$  is the total number of subjects and  $y_k$  is the genotype of the  $k$ th subject. The similarity  
223 measure was adapted on SNP datasets based on the premise that the more individuals carrying the  
224 same genotype concerning two given SNPs or two SNP-sets (signified by a relatively small  
225 Hamming distance), the more similar the variants are and more likely to cluster [30].

226

227 Multiple cluster analyses were performed exclusively on GWAS-identified and top-ranking SNPs  
228 obtained by random forest. As shown in Table 1, the number of SNPs analyzed was gradually  
229 increased to achieve a higher likelihood of discovering novel susceptibility loci. Each  
230 implementation resulted in candidate SNP-sets identified using the following parameters:

## MACHINE LEARNING-BASED SNP-SET ANALYSIS

231 *percentile cut* which specifies the height wherein a dendrogram will be cut and *minimum cluster*  
232 *size* which dictates the minimum number of SNPs for all clusters.

233

234 Table 1. Number of SNPs subjected to cluster analysis

| Cluster analysis | Number of SNPs included* |
|------------------|--------------------------|
| 1                | 1047                     |
| 2                | 2044                     |
| 3                | 3041                     |
| 4                | 4038                     |
| 5                | 5036                     |

235 \*The set of SNPs included in the cluster analysis is the union of the 52 significant SNPs from Kim et. al.'s  
236 GWAS [39] and the top biomarkers identified by random forest (starting from top 1000 to top 5000 SNPs  
237 in increments of 1000).

### 238 **Association test**

239 Hamming distance-based association tests (HDAT) [30] were employed to identify the candidate  
240 SNP-sets significantly associated with HBsAg seroclearance. The presence of association depends  
241 on the amount of difference in the biomarkers found in cases and controls. Minor alleles were  
242 incorporated in the equations as it reveals more similarities in the genomes of two individuals than  
243 common alleles [43]. A comprehensive discussion of the equations used in HDAT can be found  
244 in [30]. Permutation test, a non-parametric test used to evaluate the statistical significance of a  
245 model through randomization, is used to compute the p-value of each SNP-set. The test calculates

## MACHINE LEARNING-BASED SNP-SET ANALYSIS

246 the *p-value* by permuting the dataset and constructing a test-statistic distribution and evaluating  
247 the probability that a test-statistic would be equal to or more extreme than the initial computed  
248 value.

## 249 **Results**

### 250 **Top-ranking SNPs from dimension reduction**

251 This study used random forest feature selection to reduce dataset dimensions prior to conducting  
252 cluster analysis. Specifically, random forest was employed to rank SNPs based on their feature  
253 importance score, a measure which determines a variant's relevance in making accurate phenotype  
254 predictions. SNPs are assigned a feature importance score based on the average scores for every  
255 fold in LOOCV to eliminate bias and ensure robustness. Investigation into the functional  
256 significance of three of the top five biomarkers ranked by RF led to possible connections between  
257 the variants and HBsAg seroclearance. SNPs rs28588178 (top-ranking SNP), rs1994209 (3rd-  
258 ranking SNP), and rs7958186 (5th-ranking SNP) are linked with Cadherin 4 (CDH4), PIG11, and  
259 PCED1B, respectively—genes reported to be associated with hepatocellular carcinoma (HCC)  
260 [44, 45, 46], a disease that can develop due to the presence of the hepatitis B virus.

### 261 **Generated SNP-sets**

262 Upon performing multiple cluster analyses, a total of 108 candidate SNP-sets were identified at a  
263 percentile cut of 0.9 and a minimum cluster size of 3. SNP-sets with the maximum number of  
264 SNPs were chosen in cases where there were overlaps to maximize the information obtained from  
265 the analyses.

266

## MACHINE LEARNING-BASED SNP-SET ANALYSIS

267 SNP-sets containing SNPs which were considered significant in a previous GWAS were  
268 investigated as the variants sharing high degrees of similarity with GWAS-identified SNPs may  
269 also provide insights into trait etiology. As shown in Table 2, SNPs rs2399971, rs2119977,  
270 rs6826277, rs35689347, rs1505687, and rs741229 were grouped with at least one of the variants  
271 reported to be significantly associated with HBsAg seroclearance. No information regarding  
272 possible association existing between the latter five SNPs and the phenotype of interest was found;  
273 meanwhile, the opposite was true for rs2399971. Notably, albeit rs2399971 had not reached the  
274 cut-off value used in the GWAS performed by Kim et al. [39] on the whole study population, it  
275 was nevertheless found to be significantly associated with HBsAg seroclearance in the subjects  
276 who had received antiviral treatment [39]. Fig. 2 shows the dendrogram of the GWAS-identified  
277 SNPs together with the aforementioned six variants and as presented, the SNPs belonging to the  
278 SNP-set which contains rs2399971 shows the least height differences, indicating that the SNPs in  
279 the set are more similar to each other than the variants found in other clusters.

280

281 Table 2. Cluster memberships of the SNPs that obtained a p-value less than  $10^{-4}$  in Kim et. al.'s  
282 GWAS [39]

283

| SNP-set | SNPs                                                                                          | Gene <sup>a</sup>                       | Chromosome |
|---------|-----------------------------------------------------------------------------------------------|-----------------------------------------|------------|
| 1       | <b>rs1809862, rs10769023, rs10838245,</b><br><b>rs2017434, rs2047456, rs7945342, rs872751</b> | UBQLNL;<br><b>rs7945342</b><br>- OLFM5P | 11         |
| 2       | rs2399971, <b>rs10508462, rs2153442,</b><br><b>rs4748035</b>                                  | BEND7                                   | 10         |

## MACHINE LEARNING-BASED SNP-SET ANALYSIS

|   |                                                                                      |                                                                                                                       |    |
|---|--------------------------------------------------------------------------------------|-----------------------------------------------------------------------------------------------------------------------|----|
| 3 | <b>rs2215905, rs2192611, rs199869387,</b><br><b>rs887941, rs12464531, rs13018470</b> | -                                                                                                                     | 2  |
| 4 | rs2119977, rs6826277, <b>rs11931577</b>                                              | -                                                                                                                     | 4  |
| 5 | <b>rs6749972, rs1558599, rs11891860,</b><br><b>rs17584600</b>                        | -                                                                                                                     | 2  |
| 6 | rs35689347, <b>rs2173091, rs8037510</b>                                              | AGBL1                                                                                                                 | 15 |
| 7 | <b>rs6462008, rs6947275, rs6462003</b>                                               | <b>rs6462008</b><br>- EVX1,<br>HOXA13;<br><br><b>rs6947275</b><br>- HOTTIP, EVX1;<br><br><b>rs6462003</b><br>- HOXA13 | 7  |
| 8 | rs1505687, <b>rs12620748, rs13382813</b>                                             | <b>rs12620748</b> and<br><b>rs13382813</b><br>- LINC01246                                                             | 2  |
| 9 | rs741229, <b>rs12151705, rs6737829</b>                                               | -                                                                                                                     | 2  |

284 SNPs in boldface are those that obtained a p-value less than  $10^{-4}$  in Kim et. al.'s GWAS [39].

285 a: Genes were retrieved from dbSNP [47] and [39].

286

### 287 **Significant SNP-sets**

288 Hamming distance-based association test (HDAT) was performed on the candidate SNP-sets to

289 further identify SNPs possibly associated with HBsAg seroclearance. After performing a

290 Bonferroni correction for multiple tests, 11 SNP-sets significantly associated with HBsAg

291 seroclearance ( $p\text{-value} < 0.0005$ ) were identified, the majority of which (7 out of 11) were found

292 to harbor at least one of the GWAS-identified SNPs. Among the SNP-sets obtaining the lowest

## MACHINE LEARNING-BASED SNP-SET ANALYSIS

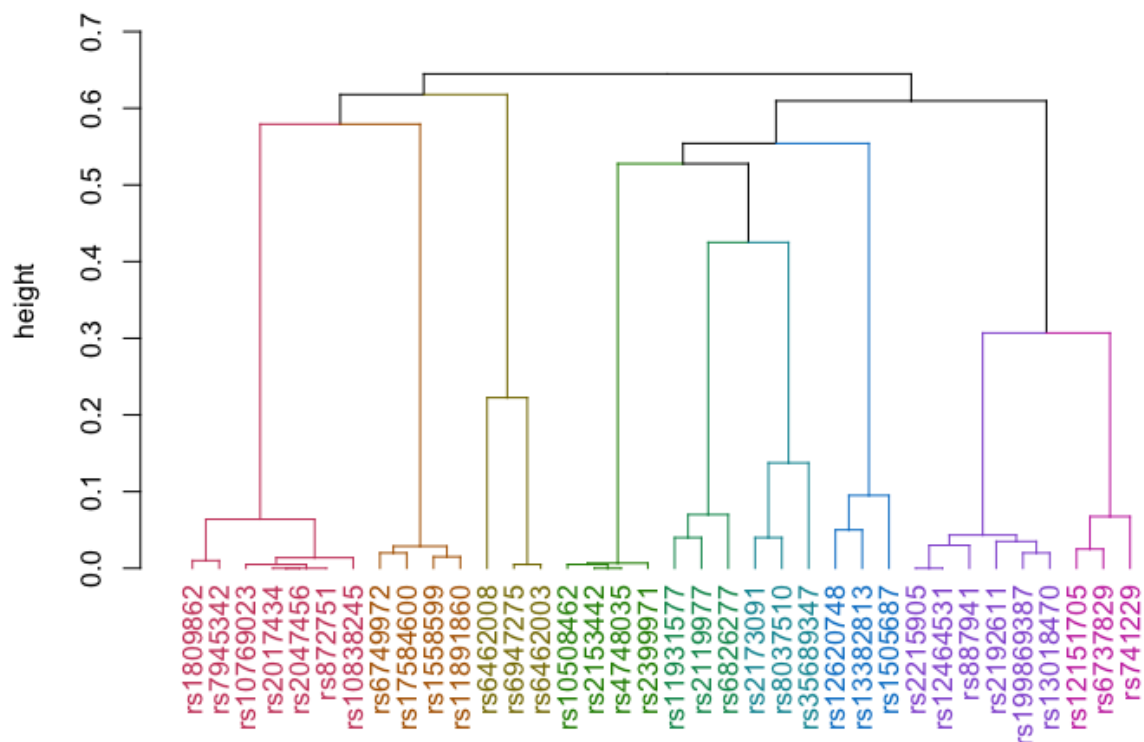

293

294 Fig. 2: Dendrogram of the SNPs listed in Table 2.

295

296 p-values, the set which obtained the highest test statistic is the one composed of rs1809862,  
297 rs10769023, rs10838245, rs2017434, rs2047456, rs7945342, and rs872751—all GWAS-identified  
298 SNPs [39]. All these variants reside in 11p15.4, a region that shows a possible correlation with  
299 HBsAg seroclearance. In a study by [48], it was observed that among hepatocellular carcinoma  
300 cases, more than 20 percent loss of heterozygosity (LOH) was shown for locus 11p, wherein region  
301 11p15 was commonly affected. Moreover, a significant correlation was found to exist between  
302 LOH on 11p and HBsAg positivity. Specifically, results showed that there is a significantly higher  
303 frequency of LOH on 11p among hepatitis B virus carriers [48].

304



## MACHINE LEARNING-BASED SNP-SET ANALYSIS

305 Table 3 shows the five significant SNP-sets which do not hold any of the GWAS-identified SNPs.  
306 No supporting evidence was found regarding possible associations between the individual variants  
307 belonging to the five SNP-sets and HBsAg seroclearance. Nonetheless, interesting findings were  
308 discovered when SNPs were analyzed collectively. Results showed that three out of the five SNP-  
309 sets in Table 3 harbor SNPs residing in similar genes, i.e. there is a corresponding gene for each  
310 distinct set. These are the following: (1) LOC105373438 for SNP-set 3, (2) LINC00578 for SNP-  
311 set 4, and (3) STOX2 for SNP-set 5. In [49], LINC00578 was reported to be a prognostic marker  
312 for pancreatic cancer (PC), a disease for which hepatitis B has been suggested to be a risk factor  
313 [50, 51, 52], increasing the likelihood of PC by 24% [53].

314

315 Table 3. SNP-sets obtaining the lowest p-values (excluding those that harbor variants reported by  
316 Kim et al. to be significantly associated with HBsAg seroclearance)

| SNP-set | List of SNPs                                                | p-value* |
|---------|-------------------------------------------------------------|----------|
| 1       | rs6731235, rs199703414, rs16829541, rs1485096,<br>rs2341849 | 0.0002   |
| 2       | rs28365850, rs62625038, rs17102970                          | 0.0004   |
| 3       | rs59659073, rs10754962, rs2380525                           | 0.0004   |
| 4       | rs200957040, rs1499880, rs4857702                           | 0.0004   |
| 5       | rs12644266, rs13130260, rs6815422                           | 0.0001   |

317 \*p-values were obtained from 10000 permutations

## MACHINE LEARNING-BASED SNP-SET ANALYSIS

### 318 **Discussion**

319 This study aims to discover novel trait-associated susceptibility loci by augmenting previous  
320 GWAS findings using a machine learning-based SNP-set analysis approach built on the integration  
321 of RF and cluster analysis. Investigation into the functional relevance of variants found in the same  
322 SNP-set containing GWAS-identified SNPs and SNP-sets obtaining significant p-values led to the  
323 discovery of loci that may also contribute to phenotypic expression yet overlooked by GWAS as  
324 a consequence of stringent detection conditions and neglect for SNP-SNP interactions in the  
325 experimental design. The novelty in our proposed method lies in the GWAS-based and data-driven  
326 approach in feature selection prior to cluster analyses. This study did not restrict the discovery of  
327 susceptibility loci to a certain genomic region alone as the criteria for selecting SNPs depend on  
328 statistical significance and predictive powers. As a result, the resulting SNP-sets implicated a  
329 varied selection of genes and cytobands.

330

331 The proposed method was applied on an HBsAg seroclearance GWAS data [39] and was able to  
332 detect SNP rs2399971 as it showed a high degree of similarity with GWAS-identified SNPs. Note  
333 that variant rs2399971, albeit not considered significant in the GWAS conducted on the whole  
334 study population (obtaining a p-value of  $1.05 \times 10^{-4}$  wherein the cut-off p-value used was  $1.00 \times 10^{-4}$ ),  
335 nevertheless exhibited significance in the subgroup analysis performed (p-value of  $4.60 \times 10^{-5}$ ).  
336 This result demonstrates that by reducing the unit of analysis into groups and exploiting previous  
337 GWAS findings, an increase in detection power could be achieved as a result of pooled strengths  
338 of signal. Through SNP-set analysis, it also becomes possible to generate hypotheses not only on  
339 SNPs but also on other larger biological units such as genes or cytobands [29, 18]. For instance,  
340 gene LINC00578 and locus 11p15, regions implicated by two of the SNP-sets with the lowest p-

## MACHINE LEARNING-BASED SNP-SET ANALYSIS

341 values, have shown potential in understanding HBsAg seroclearance as both are linked with  
342 diseases associated with the presence of hepatitis B virus infection. By mapping out these  
343 implicated regions and identifying shared susceptibility loci with a well-researched phenotype, a  
344 better understanding of the intricate underpinnings of the trait of interest could be achieved. For  
345 instance, some of the SNPs associated with height may be considered in understanding the etiology  
346 of HBsAg seroclearance as 11p15 has been reported to harbor genes responsible for growth and  
347 development [54]. Furthermore, elevations in alanine transaminase (ALT) level, a consideration  
348 in declaring HBsAg seroclearance, was found to be an important factor for growth impairment in  
349 children [55].

350  
351 Despite the advantages, the proposed method is subject to several limitations such as time and  
352 computational constraints affecting the total number of SNPs for inclusion in the cluster analyses;  
353 therefore, variants possibly associated with the trait but obtaining low feature importance scores  
354 might not be accounted for. Secondly, parameter values would still have to be tuned by utilizing  
355 specific measures such as gap statistics [56, 57] to ensure an optimal number and a more cohesive  
356 composition of SNP-sets. Lastly, there is a lack of previous research on the integration of  
357 unsupervised and supervised machine learning techniques in analyzing SNP data as well as a  
358 scarcity of studies on SNP-set formation and trait-association. Considering these limitations,  
359 results obtained from the analysis necessitate further biological investigation.

## 360 **Conclusion**

361 This study aims to identify disease-associated susceptibility loci by augmenting previous GWAS  
362 findings using the integration of RF and cluster analysis. The proposed approach was applied to a

## MACHINE LEARNING-BASED SNP-SET ANALYSIS

363 hepatitis B virus surface antigen (HBsAg) seroclearance GWAS data [39]. Thereafter, the  
364 researchers were able to detect rs2399971, a variant that was not considered to be significantly  
365 associated with the phenotype in the main GWAS, but which obtained a significantly low p-value  
366 in a subgroup analysis [39]. Results of the association tests conducted on the generated SNP-sets  
367 led to the implication of gene LINC00578 and locus 11p15. The former was linked with pancreatic  
368 cancer [49] and the latter with hepatocellular carcinoma [48], diseases associated with hepatitis B  
369 virus infection. Researchers who aim to extend this study could experiment on different supervised  
370 learning techniques for feature selection and utilize other similarity measures for clustering SNPs.  
371 With further investigation and validation, insights gleaned using the proposed framework could  
372 also be integrated into prediction models to aid in quantifying patients' risks for trait or disease  
373 development.

374

### 375 **Compliance with Ethics Requirement**

376

377 *This study used the data provided in [39] which was a project approved by the ethics committees*  
378 *at Korea University Anam Hospital (ED13220) and conducted in agreement with the ethical*  
379 *principles of the Declaration of Helsinki. According to the project's ethical declaration, all*  
380 *patients provided written informed consent for participation and use of their data for research*  
381 *purposes.*

382

### 383 **CRedit authorship contribution statement**

384

385 **Princess P. Silva:** Conceptualization, Methodology, Software, Validation, Formal Analysis,  
386 Investigation, Writing – Original Draft, Writing – Review and Editing, Visualization. **Joverlyn D.**  
387 **Gaudillo:** Conceptualization, Methodology, Validation, Investigation, Writing Original Draft,

## MACHINE LEARNING-BASED SNP-SET ANALYSIS

388 Writing - Review and Editing, Supervision, Data Curation. **Julianne A. Vilela:** Conceptualization,  
389 Writing – Review and Editing. **Ranzivelle Marianne L. Roxas-Villanueva:** Resources, Writing  
390 - Review and Editing, Project Administration, Funding Acquisition. **Beatrice J. Tiangco:**  
391 Resources, Project Administration, Funding Acquisition. **Mario R. Domingo:** Resources, Project  
392 Administration, Funding Acquisition. **Jason R. Albia:** Resources, Writing – Review and Editing,  
393 Project Administration, Funding Acquisition.

394

### 395 **Declaration of Competing Interest**

396 *The authors declare that they have no known competing financial interests or personal*  
397 *relationships that could have appeared to influence the work reported in this paper.*

398

### 399 **Acknowledgment**

400 The authors would like to thank the Department of Science and Technology – Philippine Council  
401 for Health Research and Development (DOST-PCHRD) for providing the necessary funding and  
402 assistance that made this study possible. The analysis conducted herein acts as a preliminary study  
403 for the project sponsored by DOST-PCHRD entitled “AI-driven Integration of Genomic,  
404 Ultrasound, Serum Biomarkers, and Clinical data for Early diagnosis of Liver Cancer” under the  
405 program “Early CANcer Detection in the LivEr of Filipinos with Chronic Hepatitis B Using AI-  
406 Driven Integration of Clinical and Genomic Biomarkers (CANDLE Study)”.

407

408

409

410

411

412

## MACHINE LEARNING-BASED SNP-SET ANALYSIS

413

### 414 **References**

415

416 [1] D. Lvovs, O.O. Favorova, A.V. Favorov, A polygenic approach to the study of polygenic  
417 diseases, *Acta Naturae* 4 (3) (2012) 59-71. PMID: 23150804. PMCID: PMC3491892.

418

419 [2] N.J. Schork, Genetics of complex disease: approaches, problems, and solutions, *Am J Respir*  
420 *Care Med* 156 (4) (1997) S103-S109. doi: 10.1164/ajrccm.156.4.12-tac-5.

421

422 [3] P.M. Visscher, N.R. Wray, Q. Zhiang, P. Sklar, M.I. McCarthy, M.A. Brown, *et al.*, 10 years  
423 of GWAS discovery: biology, function, and translation, *Am J Hum Genet* 101 (1) (2017) 5-22.  
424 doi: 10.1016/j.ajhg.2017.06.005.

425

426 [4] A. Torkamani, N.E. Wineinger, E.J. Topol, The personal and clinical utility of polygenic risk  
427 scores, *Nat Rev Genet* 19 (9) (2018) 581-590. doi: 10.1038/s41576-018-0018-x.

428

429 [5] K. Norrgard, Genetic variation and disease: GWAS [Internet], *Nat Educ*; 2008 [cited 2022 Mar  
430 8], Available from: [https://www.nature.com/scitable/topicpage/genetic-variation-and-disease-](https://www.nature.com/scitable/topicpage/genetic-variation-and-disease-gwas-682/#)  
431 [gwas-682/#](https://www.nature.com/scitable/topicpage/genetic-variation-and-disease-gwas-682/#).

432

433 [6] K. Michailidou, S. Lindström, J. Dennis, J. Beesley, S. Hui, S. Kar, *et al.*, Association analysis  
434 identifies 65 new breast cancer risk loci, *Nature* 551 (7678) (2017) 92-94. doi:  
435 10.1038/nature24284.

436

## MACHINE LEARNING-BASED SNP-SET ANALYSIS

- 437 [7] W. Zhao, A. Rasheed, E. Tikkanen, J-J. Lee, A.S. Butterworth, J.M.M. Howson, *et al.*,  
438 Identification of new susceptibility loci for type 2 diabetes and shared etiological pathways with  
439 coronary heart disease, *Nat Genet* 49 (10) (2017) 1450-1457. doi: 10.1038/ng.3943.  
440
- 441 [8] Y. Kakuta, Y. Kawai, T. Naito, A. Hirano, J. Umeno, Y. Fuyuno, *et al.*, A genome-wide  
442 association study identifying *RAP1A* as a novel susceptibility gene for Crohn's disease in Japanese  
443 individuals, *J Crohns Colitis* 13 (5) (2019) 648-658. doi: 10.1093/ecco-jcc/jjy197.  
444
- 445 [9] A.A.V. Antikainen, N. Sandholm, D-A. Trégouët, R. Charmet, A.J. McKnight, T.S. Ahluwalia,  
446 *et al.*, Genome-wide association study on coronary artery disease in type 1 diabetes suggests beta-  
447 defensin 127 as a risk locus, *Cardiovasc Res* 117 (2) (2021) 600-612. doi: 10.1093/cvr/cvaa045.  
448
- 449 [10] Z. Chen, M. Boehnke, X. Wen, B. Mukherjee, Revisiting the genome-wide significance  
450 threshold for common variant GWAS, *G3* 11 (2) (2021) jkaa056. doi: 10.1093/g3journal/jkaa056.  
451
- 452 [11] E. Génin, Missing heritability of complex diseases: case solved?, *Hum Genet* 139 (1) (2020)  
453 103-113. doi: 10.1007/s00439-019-02034-4.  
454
- 455 [12] E.E. Eichler, J. Flint, G. Gibson, A. Kong, S.M. Leal, J.H. Moore, *et al.*, Missing heritability  
456 and strategies for finding the underlying causes of complex disease, *Nat Rev Genet* 11 (6) (2010)  
457 446-450. doi: 10.1038/nrg2809.  
458

## MACHINE LEARNING-BASED SNP-SET ANALYSIS

459 [13] R.J. Klein, Power analysis for genome-wide association studies, *BMC Genet* 8 (1) (2007) 1-  
460 8. doi: 10.1186/1471-2156-8-58.

461  
462 [14] V. Tam, N. Patel, M. Turcotte, Y. Bossé, G. Paré, D. Meyre, Benefits and limitations of  
463 genome-wide association studies, *Nat Rev Genet* 20 (8) (2019) 467-484. doi: 10.1038/s41576-  
464 019-0127-1.

465  
466 [15] J-C. Lambert, C.A. Ibrahim-Verbaas, D. Harold, A.C. Naj, R. Sims, C. Bellenguez, *et al.*,  
467 Meta-analysis of 74,046 individuals identifies 11 new susceptibility loci for Alzheimer's disease,  
468 *Nat Genet* 45 (12) (2013) 1452-1458. doi: 10.1038/ng.2802.

469  
470 [16] L. Yengo, J. Sidorenko, K.E. Kemper, Z. Zheng, A.R. Wood, M.N. Weedon, *et al.*, Meta-  
471 analysis of genome-wide association studies for height and body mass index in ~700 000  
472 individuals of European ancestry, *Hum Mol Genet* 27 (20) (2018) 3641-3649. doi:  
473 10.1093/hmg/ddy271.

474  
475 [17] G. Ken-Dror, S.E. Humphries, F. Drenos, The use of haplotypes in the identification of  
476 interaction between SNPs, *Hum Hered* 71 (1) (2013) 44-51. doi: 10.1159/000350964.

477  
478 [18] M.C. Wu, P. Kraft, M.P. Epstein, D.M. Taylor, S.J. Chanock, D.J. Hunter, *et al.*, Powerful  
479 SNP-set analysis for case-control genome-wide association studies, *Am J Hum Genet* 86 (6)  
480 (2010) 929-942. doi: 10.1016/j.ajhg.2010.05.002.

481



## MACHINE LEARNING-BASED SNP-SET ANALYSIS

- 482 [19] D.M. Howard, L.S. Hall, J.D. Hafferty, Y. Zeng, M.J. Adams, T-K. Clarke, *et al.*, Genome-  
483 wide haplotype-based association analysis of major depressive disorder in Generation Scotland  
484 and UK Biobank, *Transl Psychiatry* 7 (11) (2017) 1-9. doi: 10.1038/s41398-017-0010-9.  
485
- 486 [20] A. Alonso-Gonzalez, M. Calaza, C. Rodriguez-Fontenla, A. Carracedo, Gene-based analysis  
487 of ADHD using PASCAL: a biological insight into the novel associated genes, *BMC Med Genet*  
488 12 (1) (2019) 1-2. doi: 10.1186/s12920-019-0593-5.  
489
- 490 [21] L. Jin, X-Y. Zuo, W-Y. Su, X-L. Zhao, M-Q. Yuan, L-Z. Han, *et al.*, Pathway-based analysis  
491 tools for complex diseases: a review, *GPB* 12 (5) (2014) 210-220. doi: 10.1016/j.gpb.2014.10.002.  
492
- 493 [22] J.F. McCarthy, K.A. Marx, P.E. Hoffman, A.G. Gee, P. O'Neil, M.L. Ujwal, *et al.*,  
494 Applications of machine learning and high-dimensional visualization in cancer detection,  
495 diagnosis, and management, *Ann N Y Acad Sci* 1020 (1) (2004) 239-262. doi:  
496 10.1196/annals.1310.020.  
497
- 498 [23] A. Roy, A classification algorithm for high-dimensional data, *Procedia Comput Sci* 53 (2015)  
499 345-355. doi: 10.1016/j.procs.2015.07.311.  
500
- 501 [24] P. Thottakkara, T. Ozrazgat-Baslanti, B.B. Hupf, P. Rashidi, P. Pardalos, P. Momcilovic, *et*  
502 *al.*, Application of machine learning techniques to high-dimensional clinical data to forecast  
503 postoperative complications, *PLoS One* 11 (5) (2016) e0155705. doi:  
504 10.1371/journal.pone.0155705.

## MACHINE LEARNING-BASED SNP-SET ANALYSIS

505  
506 [25] J. Gaudillo, J.J.R. Rodriguez, A. Nazareno, L.R. Baltazar, J. Vilela, R. Bulalacao, *et al.*,  
507 Machine learning approach to single nucleotide polymorphism-based asthma prediction PLoS  
508 One, 14 (12) (2019) e0225574. doi: 10.1371/journal.pone.0225574.

509  
510 [26] M. Ramezani, P. Mouches, E. Yoon, D. Rajashekar, J.A. Ruskey, E. Leveille, *et al.*,  
511 Investigating the relationship between the SNCA gene and cognitive abilities in idiopathic  
512 Parkinson's disease using machine learning, Sci Rep 11 (1) (2021) 1-10. doi: 10.1038/s41598-  
513 021-84316-4.

514  
515 [27] Z. Zhang, Z-P. Liu, Robust biomarker discovery for hepatocellular carcinoma from high-  
516 throughput data by multiple feature selection methods, BMC Med Genet 14 (1) (2021) 1-12. doi:  
517 10.1186/s12920-021-00957-4.

518  
519 [28] K. Ickstadt, T. Mueller, H. Schwender, Analyzing SNPs: Are there needles in the haystack?,  
520 Chance mag 19 (3) (2006) 21-26. doi: 10.1080/09332480.2006.10722798.

521  
522 [29] M.K. Ng, M.J. Li, S.I. Ao, P.C. Sham, Y-M. Cheung, J.Z. Huang, Clustering of SNP data  
523 with application to genomics, Sixth IEEE International Conference on Data Mining - Workshops  
524 (ICDMW'06) (2006) 158-162. doi: 10.1109/ICDMW.2006.43.

525

## MACHINE LEARNING-BASED SNP-SET ANALYSIS

526 [30] C. Wang, W-H. Kao, C.K. Hsiao, Using Hamming distance as information for SNP-sets  
527 clustering and testing in disease association studies, PLoS One 10 (8) (2015) e0135918. doi:  
528 10.1371/journal.pone.0135918.

529  
530 [31] Y. Xu, L. Xing, J. Su, X. Zhang, W. Qiu, Model-based clustering for identifying disease-  
531 associated SNPs in case-control genome-wide association studies, Sci Rep 9 (1) (2019) 1-10. doi:  
532 10.1038/s41598-019-50229-6.

533  
534 [32] N.Venkat, The curse of dimensionality: inside out, Pilani (IN): Birla Institute of Technology  
535 and Science, Pilani, Department of Computer Science and Information Systems (2018). doi:  
536 10.13140/RG.2.2.29631.36006.

537  
538 [33] N. Altman, M. Krzywinski, The curse(s) of dimensionality, Nat Methods 15 (6) (2018) 399-  
539 400. doi: 10.1038/s41592-018-0019-x.

540  
541 [34] T-T. Nguyen, J.Z. Huang, Q. Wu, T.T. Nguyen, M.J. Li, Genome-wide association data  
542 classification and SNPs selection using two-stage quality-based random forests, BMC Genom 16  
543 (2) (2015) 1-11. doi: 10.1186/1471-2164-16-S2-S5.

544  
545 [35] U. Roshan, S. Chikkagoudar, Z. Wei, K. Wang, H. Hakonarson, Ranking causal variants and  
546 associated regions in genome-wide association studies by the support vector machine and random  
547 forest, Nucleic Acids Res 39 (9) (2011) e62. doi: 10.1093/nar/gkr064.

548

## MACHINE LEARNING-BASED SNP-SET ANALYSIS

549 [36] W. Zhou, E.S. Bellis, J. Stubblefield, J. Causey, J. Qualls, K. Walker, *et al.*, Minor QTLs  
550 mining through the combination of GWAS and machine learning feature selection, BioRxiv  
551 [Preprint] (2019). doi: 10.1101/702761.

552

553 [37] A. Bureau, J. Dupuis, K. Falls, K.L. Lunetta, B. Hayward, T.P. Keith, *et al.*, Identifying SNPs  
554 predictive of phenotype using random forests, *Genet Epidemiol* 28 (2) (2005) 171-182. doi:  
555 10.1002/gepi.20041.

556

557 [38] X-S. Yang, S. Lee, S. Lee, N. Theera-Umpon, Information analysis of high-dimensional data  
558 and applications, *Math Probl Eng* 2015 (2015). doi: 10.1155/2015/126740.

559

560 [39] T.H. Kim, E-J. Lee, J-H. Choi, S.Y. Yim, S. Lee, J. Kang, Identification of novel susceptibility  
561 loci associated with hepatitis B surface antigen seroclearance in chronic hepatitis B, *PLoS One* 13  
562 (7) (2018) e0199094. doi: 10.1371/journal.pone.0199094.

563

564 [40] V. Botta, G. Louppe, P. Geurts, L. Wehenkel, Exploiting SNP correlations within random  
565 forest for genome-wide association studies, *PLoS One* 9 (4) (2014) e93379 doi:  
566 10.1371/journal.pone.0093379.

567

568 [41] S. Selinski, Similarity measures for clustering SNP and epidemiological data, Technical  
569 Report, No. 2006,25, Dortmund (DE): University of Dortmund, Collaborative Research Center  
570 'Reduction of Complexity in Multivariate Data Structures' (SFB 475) (2006). Available from:  
571 <http://hdl.handle.net/10419/22668>.

## MACHINE LEARNING-BASED SNP-SET ANALYSIS

572

573 [42] R.W. Hamming, Error detecting and error correcting codes, *Bell Syst Tech J* 29 (2) (1950),  
574 147-160. doi: 10.1002/j.1538-7305.1950.tb00463.x.

575

576 [43] J. Wessel, N.J. Schork, Generalized genomic distance-based regression methodology for  
577 multilocus association analysis, *Am J Hum Genet* 79 (5) (2006) 792-806. doi: 10.1086/508346.

578

579 [44] Y. Gao, G. Wang, C. Zhang, M. Lin, X. Liu, Y. Zeng, J. Liu, Long non-coding RNA linc-  
580 cdh4-2 inhibits the migration and invasion of HCC cells by targeting R-cadherin pathway,  
581 *Biochem Biophys Res Commun* 480 (3) (2016) 348-354. doi: 10.1016/j.bbrc.2016.10.048.

582

583 [45] Y. Wu, X-M. Liu, X-J. Wang, Y. Zhang, X-Q. Liang, E-H. Cao, PIG11 is involved in  
584 hepatocellular carcinogenesis and its over-expression promotes Hepg2 cell apoptosis, *Pathol*  
585 *Oncol Res* 15 (3) (2009) 411-416. doi: 10.1007/s12253-008-9138-5.

586

587 [46] H. Ding, J. He, W. Xiao, Z. Ren, W. Gao, LncRNA PCED1B-AS1 is overexpressed in  
588 hepatocellular carcinoma and regulates miR-10a/BCL6 axis to promote cell proliferation, *Res Sq*  
589 [Preprint] (2020). doi: 10.21203/rs.3.rs-79374/v1.

590

591 [47] S.T. Sherry, M. Ward, K. Sirotkin, dbSNP—Database for Single Nucleotide Polymorphisms  
592 and Other Classes of Minor Genetic Variation, *Genome Res* 9 (1999) 677–679.

593

## MACHINE LEARNING-BASED SNP-SET ANALYSIS

594 [48] J-C. Sheu, Y-W. Lin, H-C. Chou, G-T. Huang, H-S. Lee, Y-H. Lin, *et al.*, Loss of  
595 heterozygosity and microsatellite instability in hepatocellular carcinoma in Taiwan, *Br J Cancer*  
596 80 (3) (1999) 468-476. doi: 10.1038/sj.bjc.6690380.

597

598 [49] B. Zhang, C. Li, Z. Sun, Long non-coding RNA LINC00346, LINC00578, LINC00673,  
599 LINC00671, LINC00261, and SNHG9 are novel prognostic markers for pancreatic cancer, *Am J*  
600 *Transl Res* 10 (8) (2018) 2648. PMID: 30210701. PMCID: PMC6129514.

601

602 [50] Q. Ben, Z. Li, C. Liu, Q. Cai, Y. Yuan, K. Wang, Hepatitis B virus status and risk of pancreatic  
603 ductal adenocarcinoma: a case-control study from China, *Pancreas* 41 (3) (2012) 435-440. doi:  
604 10.1097/MPA.0b013e31822ca176.

605

606 [51] U.H. Iloeje, H-I. Yang, C-L. Jen, J. Su, L-Y. Wang, S-L. You, *et al.*, Risk of pancreatic cancer  
607 in chronic hepatitis B virus infection: data from the REVEAL-HBV cohort study, *Liver Int* 30 (3)  
608 (2010) 423- 429. doi: 0.1111/j.1478-3231.2009.02147.x.

609

610 [52] Y. Wang, S. Yang, F. Song, S. Cao, X. Yin, J. Xie, *et al.*, Hepatitis B virus status and the risk  
611 of pancreatic cancer: a meta-analysis, *Eur J Cancer Prev* 22 (4) (2013) 328-334. Available from:  
612 <https://www.jstor.org/stable/48504251>.

613

614 [53] R. Desai, U. Patel, S. Sharma, S. Singh, S. Doshi, S. Shaheen, *et al.*, Association between  
615 hepatitis B infection and pancreatic cancer: a population-based analysis in the United States,  
616 *Pancreas* 47 (7) (2018) 849-855. doi: 10.1097/MPA.0000000000001095.

## MACHINE LEARNING-BASED SNP-SET ANALYSIS

617

618 [54] R. Weksberg, A.C. Smith, J. Squire, P. Sadowski, Beckwith–Wiedemann syndrome  
619 demonstrates a role for epigenetic control of normal development, *Hum Mol Genet* 12 (suppl\_1)  
620 (2003) R61-R68. doi: 10.1093/hmg/ddg067.

621

622 [55] P. Gerner, A. Hörning, S. Kathemann, K. Willuweit, S. Wirth, Growth abnormalities in  
623 children with chronic hepatitis B or C, *Adv Virol* 2012 (2012). doi: 10.1155/2012/670316.

624

625 [56] R. Tibshirani, G. Walther, T. Hastie, Estimating the number of clusters in a data set via the  
626 gap statistic, *J R Statist Soc B* 63 (2) (2001) 411-423. doi: 10.1111/1467-9868.00293.

627

628 [57] M. Yan, K. Ye, Determining the number of clusters using the weighted gap statistic,  
629 *Biometrics* 63 (4) (2007) 1031-1037. doi: 10.1111/j.1541-0420.2007.00784.x.

630

631

632

633

634

635

636

637

638

639

640

641

642

643

644

## MACHINE LEARNING-BASED SNP-SET ANALYSIS

### 645 **Tables**

646

647 Table 1. Number of SNPs subjected to cluster analysis

| Cluster analysis | Number of SNPs included* |
|------------------|--------------------------|
| 1                | 1047                     |
| 2                | 2044                     |
| 3                | 3041                     |
| 4                | 4038                     |
| 5                | 5036                     |

648 \*The set of SNPs included in the cluster analysis is the union of the 52 significant SNPs from Kim et. al.'s  
649 GWAS [39] and the top biomarkers were identified by random forest (starting from top 1000 to top 5000  
650 SNPs in increments of 1000).

651

652

653

654

655

656

657

658

659

660



MACHINE LEARNING-BASED SNP-SET ANALYSIS

661 Table 2. Cluster memberships of the SNPs that obtained a p-value less than  $10^{-4}$  in Kim et. al.'s  
 662 GWAS [39]

| SNP-set | SNPs                                                                                | Gene <sup>a</sup>                                                                                                     | Chromosome |
|---------|-------------------------------------------------------------------------------------|-----------------------------------------------------------------------------------------------------------------------|------------|
| 1       | <b>rs1809862, rs10769023, rs10838245, rs2017434, rs2047456, rs7945342, rs872751</b> | UBQLNL;<br><b>rs7945342</b><br>- OLFM5P                                                                               | 11         |
| 2       | rs2399971, <b>rs10508462, rs2153442, rs4748035</b>                                  | BEND7                                                                                                                 | 10         |
| 3       | <b>rs2215905, rs2192611, rs199869387, rs887941, rs12464531, rs13018470</b>          | -                                                                                                                     | 2          |
| 4       | rs2119977, rs6826277, <b>rs11931577</b>                                             | -                                                                                                                     | 4          |
| 5       | <b>rs6749972, rs1558599, rs11891860, rs17584600</b>                                 | -                                                                                                                     | 2          |
| 6       | rs35689347, <b>rs2173091, rs8037510</b>                                             | AGBL1                                                                                                                 | 15         |
| 7       | <b>rs6462008, rs6947275, rs6462003</b>                                              | <b>rs6462008</b><br>- EVX1,<br>HOXA13;<br><br><b>rs6947275</b><br>- HOTTIP, EVX1;<br><br><b>rs6462003</b><br>- HOXA13 | 7          |
| 8       | rs1505687, <b>rs12620748, rs13382813</b>                                            | <b>rs12620748</b> and<br><b>rs13382813</b><br>- LINC01246                                                             | 2          |

## MACHINE LEARNING-BASED SNP-SET ANALYSIS

|   |                                                |   |   |
|---|------------------------------------------------|---|---|
| 9 | rs741229, <b>rs12151705</b> , <b>rs6737829</b> | - | 2 |
|---|------------------------------------------------|---|---|

663 SNPs in boldface are those that obtained a p-value less than  $10^{-4}$  in Kim et. al.'s GWAS [39].

664 a: Genes were retrieved from dbSNP [47] and [39].

665

666

667

668

669

670

671

672

673

674

675

676

677

678

679

680

681

682

683

684

685

## MACHINE LEARNING-BASED SNP-SET ANALYSIS

686 Table 3. SNP-sets obtaining the lowest p-values (excluding those that harbor variants reported by  
687 Kim et al. [39] to be significantly associated with HBsAg seroclearance)

| SNP-set | List of SNPs                                                | p-value* |
|---------|-------------------------------------------------------------|----------|
| 1       | rs6731235, rs199703414, rs16829541, rs1485096,<br>rs2341849 | 0.0002   |
| 2       | rs28365850, rs62625038, rs17102970                          | 0.0004   |
| 3       | rs59659073, rs10754962, rs2380525                           | 0.0004   |
| 4       | rs200957040, rs1499880, rs4857702                           | 0.0004   |
| 5       | rs12644266, rs13130260, rs6815422                           | 0.0001   |

688 \*p-values were obtained from 10000 permutations

689  
690  
691  
692  
693  
694  
695  
696  
697  
698  
699  
700  
701  
702  
703  
704

## MACHINE LEARNING-BASED SNP-SET ANALYSIS

705 **Figures**

706

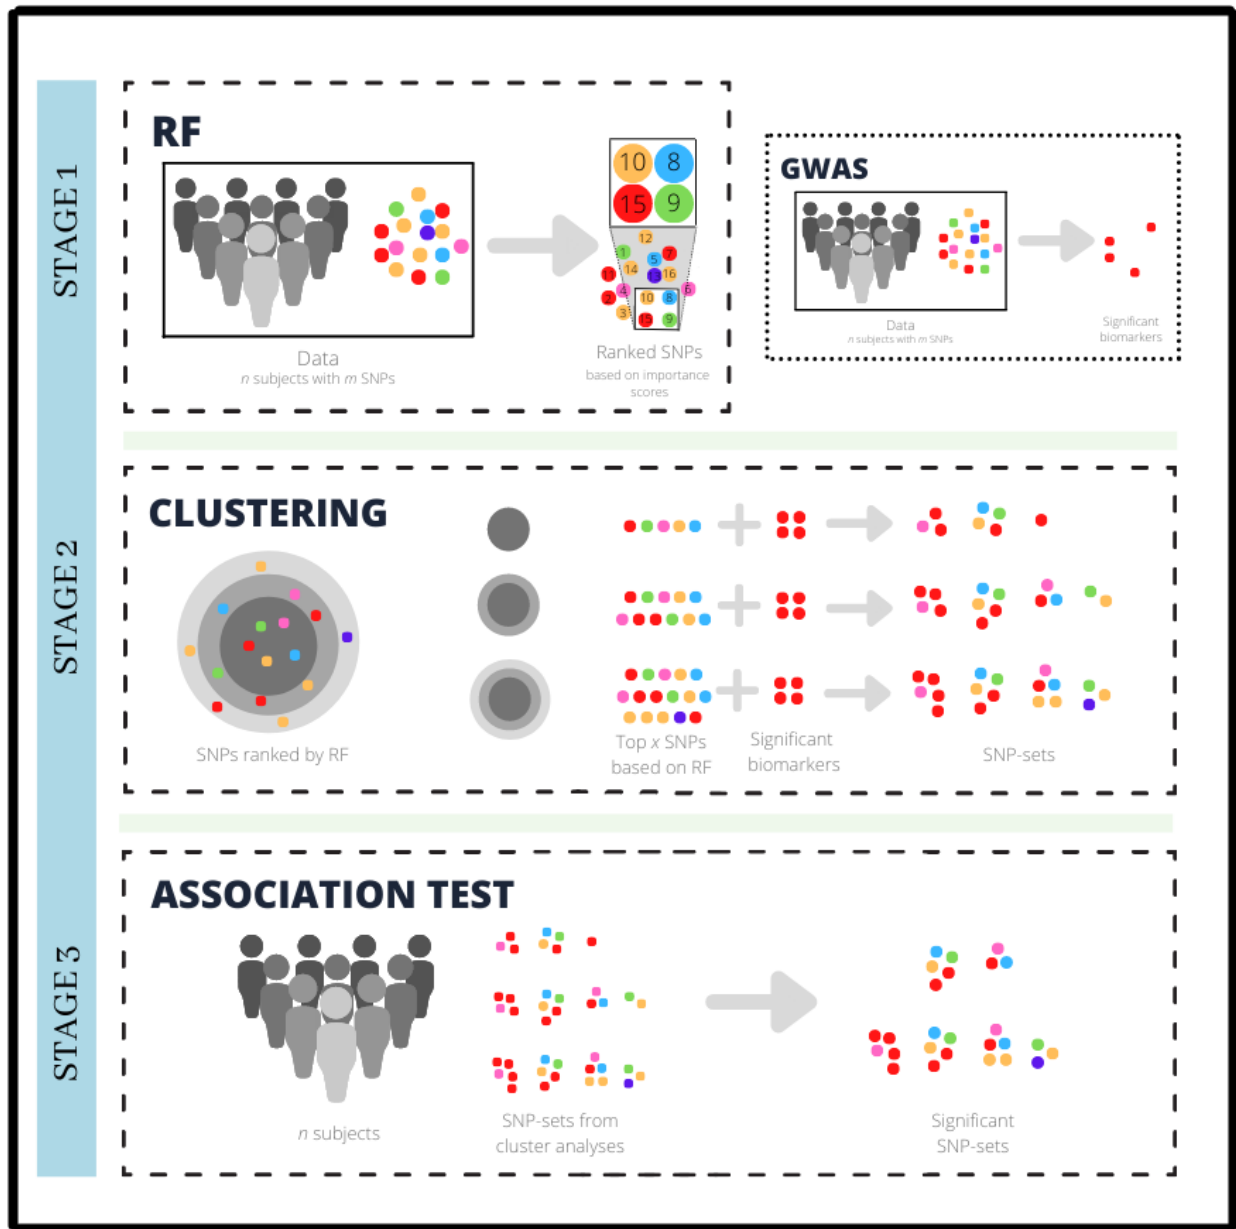

707

708 Fig. 1: The architecture of the proposed integrated framework. In Stage 2, SNPs in concentric

709 circles in darker shades of gray represent higher-ranking SNPs based on RF.

710

711

## MACHINE LEARNING-BASED SNP-SET ANALYSIS

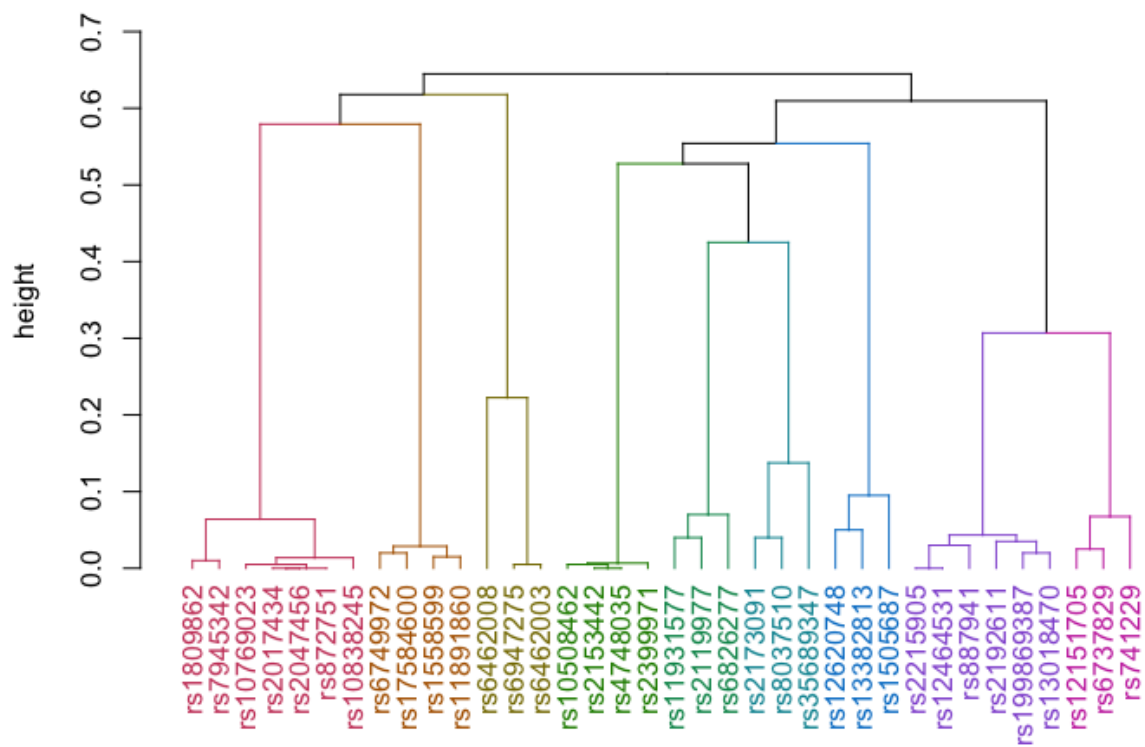

712

713 Fig. 2: Dendrogram of the SNPs listed in Table 2.

714

715

716

717

718

719

720

721

722

MACHINE LEARNING-BASED SNP-SET ANALYSIS

723 **Appendix**

724 Table A. SNP-sets significantly associated with HBsAg seroclearance (*p-value* < 0.0005)

| SNP-set | List of SNPs                                                                                            | test-statistic | p-value* |
|---------|---------------------------------------------------------------------------------------------------------|----------------|----------|
| 1       | <b>rs6749972, rs1558599,</b><br><b>rs11891860, rs17584600</b>                                           | 0.1760646465   | 4.00E-04 |
| 2       | <b>rs6462008, rs6947275,</b><br><b>rs6462003</b>                                                        | 0.1263838384   | 2.00E-04 |
| 3       | <b>rs10838245, rs1809862,</b><br><b>rs10769023, rs2017434,</b><br><b>rs2047456, rs7945342, rs872751</b> | 0.2967616162   | 3.00E-04 |
| 4       | rs2399971, <b>rs10508462,</b><br><b>rs2153442, rs4748035</b>                                            | 0.241240404    | 2.00E-04 |
| 5       | rs6731235, rs199703414,<br>rs16829541, rs1485096,<br>rs2341849                                          | 0.2778494949   | 2.00E-04 |
| 6       | rs2119977, rs6826277,<br><b>rs11931577</b>                                                              | 0.181420202    | 1.00E-04 |
| 7       | rs35689347, <b>rs8037510,</b><br><b>rs2173091</b>                                                       | 0.1386888889   | 3.00E-04 |

## MACHINE LEARNING-BASED SNP-SET ANALYSIS

|    |                                       |              |          |
|----|---------------------------------------|--------------|----------|
| 8  | rs28365850, rs62625038,<br>rs17102970 | 0.1339040404 | 4.00E-04 |
| 9  | rs59659073, rs10754962,<br>rs2380525  | 0.1153363636 | 4.00E-04 |
| 10 | rs200957040, rs1499880,<br>rs4857702  | 0.1084454545 | 4.00E-04 |
| 11 | rs12644266, rs13130260,<br>rs6815422  | 0.1604717172 | 1.00E-04 |

725 \*p-values were obtained from 10000 permutations.

726 SNPs in boldface are those that obtained a p-value less than  $10^{-4}$  in Kim et al's GWAS.

PROPOSED METHOD

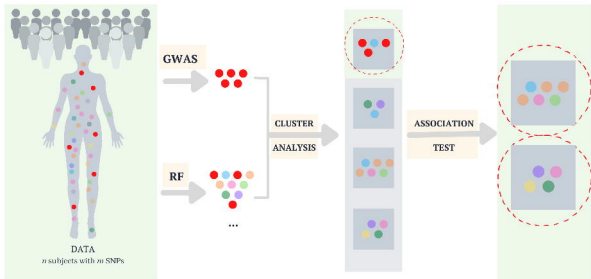

APPLICATION

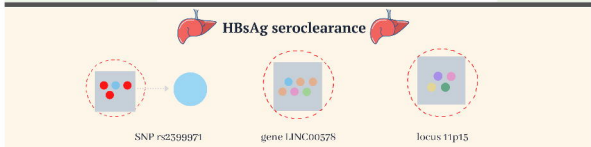

Source: https://medrxiv.org/content/10.1101/2022.04.25.22274157v1.full.pdf
